# Supplementary material for: The shape effect of TiO2 in VOx/TiO2 catalysts for selective reduction of NO by NH3
Source: Royal Society of Chemistry journal article supplement (doi:10.1039/c5ta02897c), 2015-01-01
Supplement: c5ta02897c1.pdf [file c5ta02897c1.pdf]

## Electronic Supplementary Information

### Shape effect of TiO<sub>2</sub> in VO<sub>x</sub>/TiO<sub>2</sub> catalysts for selective reduction of NO by NH<sub>3</sub>

Quanquan Shi,<sup>a</sup> Yong Li,<sup>\*a</sup> Yan Zhou,<sup>a</sup> Shu Miao,<sup>a</sup> Na Ta,<sup>a</sup> Ensheng Zhan,<sup>a</sup>

Jingyue (Jimmy) Liu<sup>\*ab</sup> and Wenjie Shen<sup>\*a</sup>

<sup>a</sup> State Key Laboratory of Catalysis, Dalian Institute of Chemical Physics, Chinese Academy of Sciences, Dalian 116023, China.

<sup>b</sup> Department of Physics, Arizona State University, Tempe, Arizona 85287, United States.

#### Corresponding Authors.

\*E-mails: yongli@dicp.ac.cn; Jingyue.Liu@asu.edu; shen98@dicp.ac.cn.

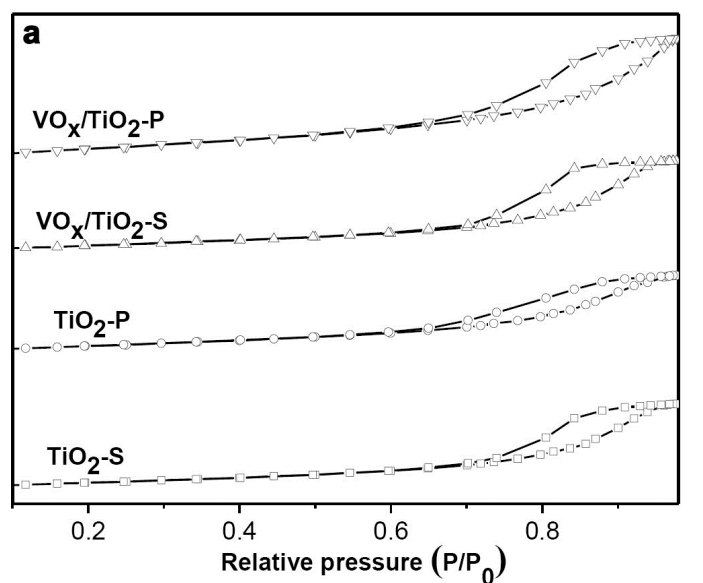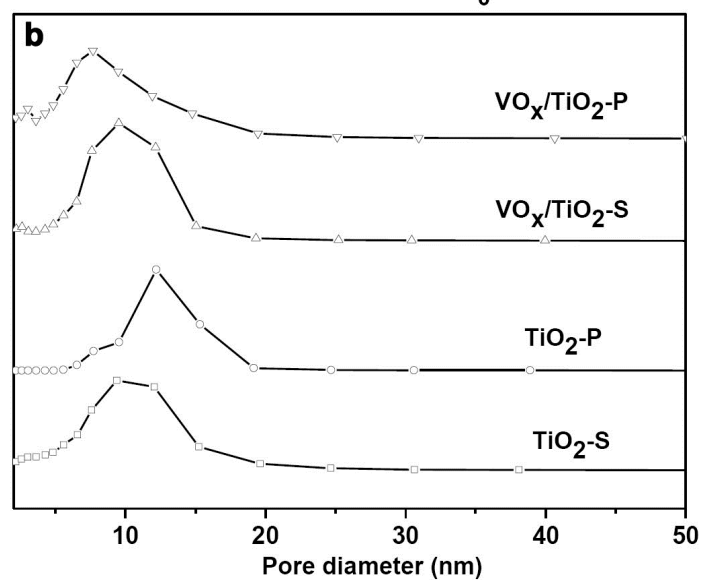

| Sample                               | Surface area (m <sup>2</sup> g <sup>-1</sup> ) | Pore volume (cm <sup>3</sup> g <sup>-1</sup> ) | Pore diameter (nm) |
|--------------------------------------|------------------------------------------------|------------------------------------------------|--------------------|
| TiO <sub>2</sub> -S                  | 87.4                                           | 0.223                                          | 9.6                |
| TiO <sub>2</sub> -P                  | 95.6                                           | 0.218                                          | 12.2               |
| VO <sub>x</sub> /TiO <sub>2</sub> -S | 70.8                                           | 0.205                                          | 9.4                |
| VO <sub>x</sub> /TiO <sub>2</sub> -P | 78.7                                           | 0.190                                          | 7.7                |

**Fig. S1** (a) Nitrogen adsorption–desorption isotherms, (b) pore size distributions, and (c) summary of physical properties of TiO<sub>2</sub> nanoparticles and VO<sub>x</sub>/TiO<sub>2</sub> catalysts.

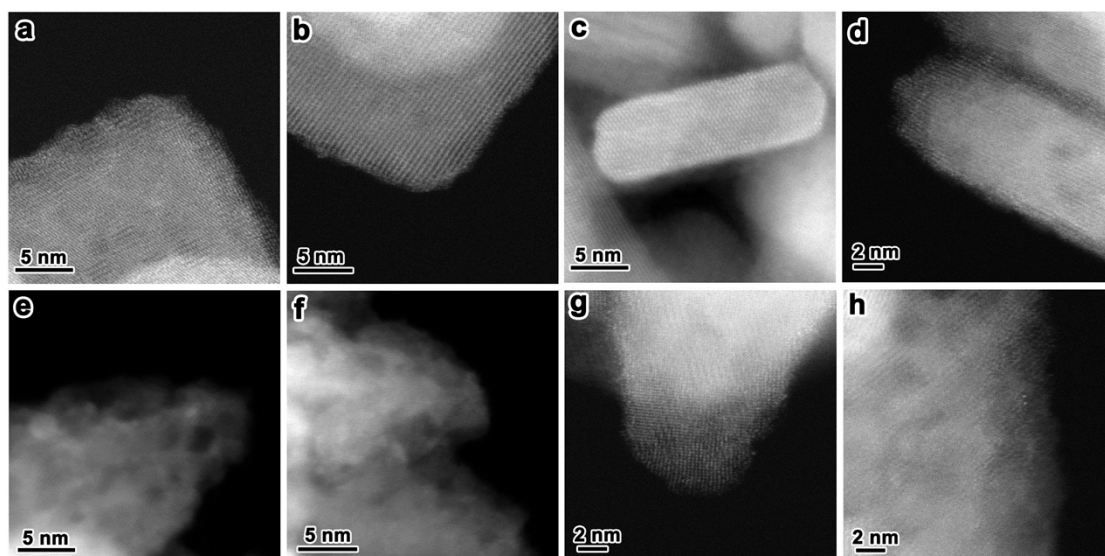

**Fig. S2** HAADF-STEM images of  $\text{VO}_x/\text{TiO}_2\text{-S}$  (a-d) and  $\text{VO}_x/\text{TiO}_2\text{-P}$  (e-h) catalysts.

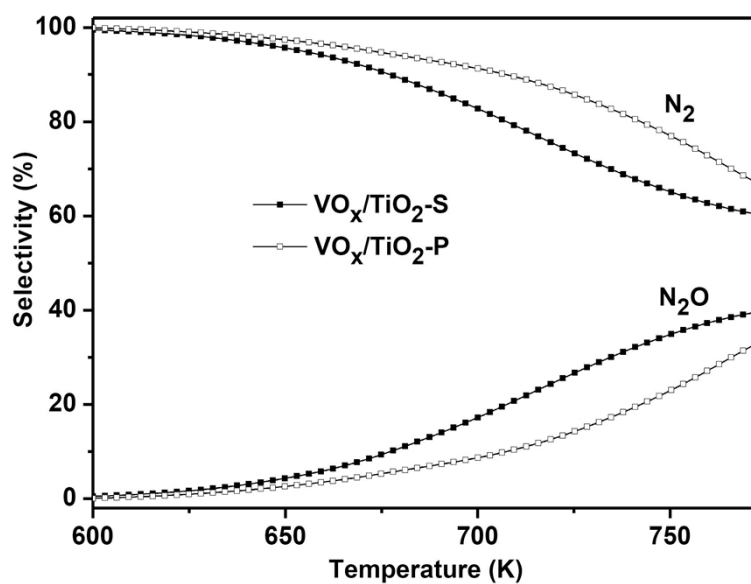

**Fig. S3**  $\text{N}_2$  and  $\text{N}_2\text{O}$  selectivities as a function of temperature on  $\text{VO}_x/\text{TiO}_2$  catalysts. Reaction conditions: 1000 ppm  $\text{NH}_3$ /1000 ppm  $\text{NO}$ /3 vol.%  $\text{O}_2$ /He, 3,6000  $\text{ml g}^{-1} \text{h}^{-1}$ .

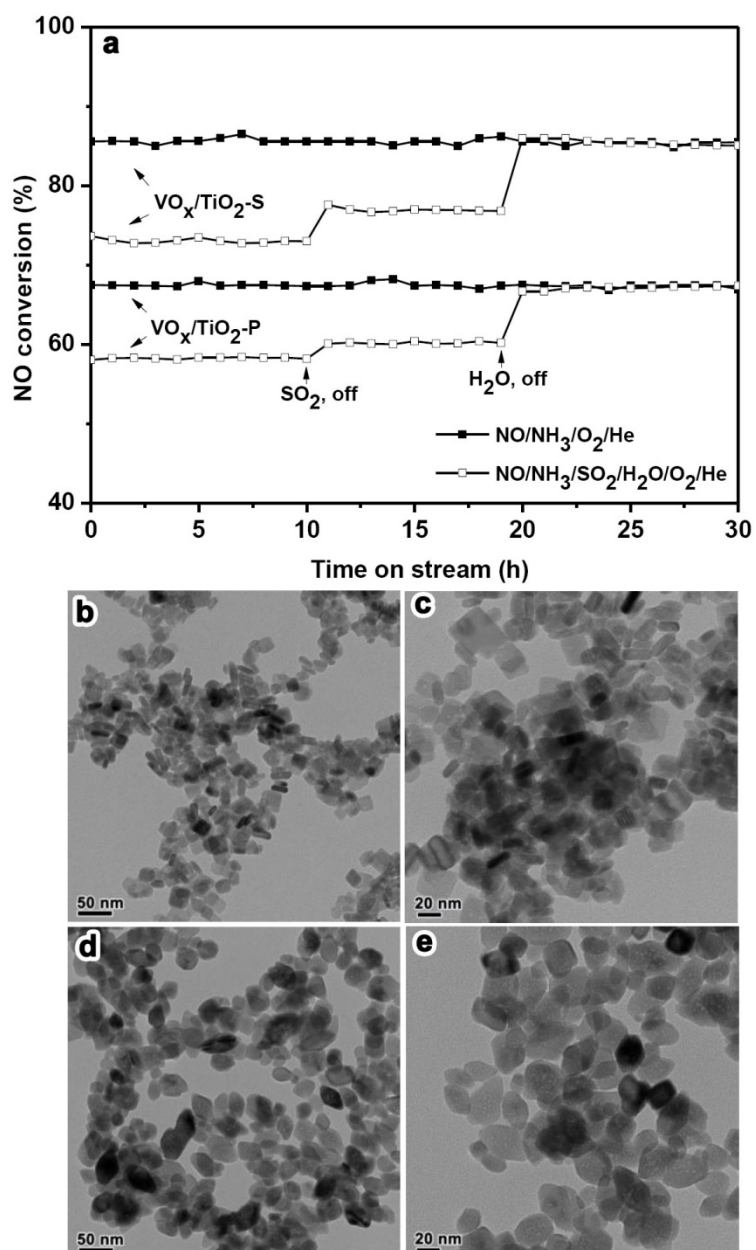

**Fig. S4** (a) Stability tests of VO<sub>x</sub>/TiO<sub>2</sub> catalysts for NH<sub>3</sub>-SCR; (b-e) TEM images of the spent VO<sub>x</sub>/TiO<sub>2</sub>-S (b, c) and VO<sub>x</sub>/TiO<sub>2</sub>-P (d, e) catalysts. Reaction conditions: 1000 ppm NH<sub>3</sub>/1000 ppm NO/3 vol.% O<sub>2</sub>/10 vol.% H<sub>2</sub>O/100 ppm SO<sub>2</sub>/He, 3,6000 ml g<sup>-1</sup> h<sup>-1</sup>, 503 K.

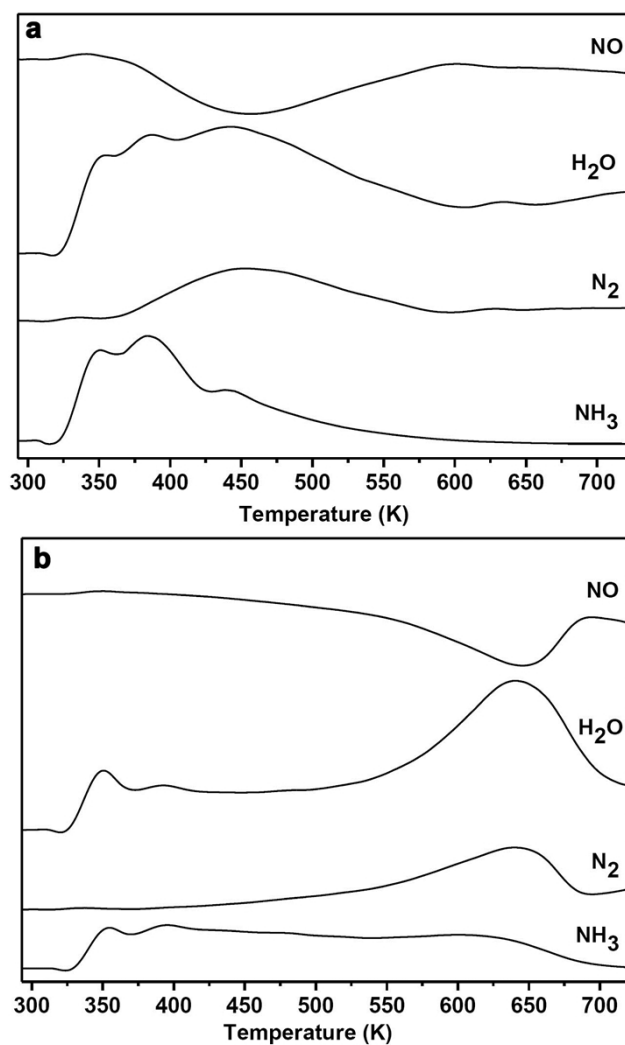

**Fig. S5** TPSR of pre-adsorbed NH<sub>3</sub> with NO/He over (a) VO<sub>x</sub>/TiO<sub>2</sub>-S and (b) VO<sub>x</sub>/TiO<sub>2</sub>-P catalysts.
